# Supplementary material
Source: publisher figshare collection journal article supplement (https://karger.figshare.com/ndownloader/files/6966899)
Supplement: Supplementary file 1 [file 6966899]

**Supplementary table 1**  
Comorbidities and Gender

| Comorbidities | pcb-Cohort<br>N=568 | Gender                   |                          | p-value* |
|---------------|---------------------|--------------------------|--------------------------|----------|
|               |                     | Male<br>N= 163           | Female<br>N= 405         |          |
| HYP           | 351 (61.8%)         | 101 <sup>a</sup> (62.0%) | 250 <sup>a</sup> (61.7%) | 0.958    |
| DYS           | 333 (58.6%)         | 92 <sup>a</sup> (56.4%)  | 241 <sup>a</sup> (59.5%) | 0.502    |
| OA            | 305 (53.7%)         | 53 <sup>a</sup> (32.5%)  | 252 <sup>b</sup> (62.2%) | 0.000    |
| CVD           | 302 (53.2%)         | 95 <sup>a</sup> (58.3%)  | 207 <sup>a</sup> (51.1%) | 0.121    |
| DEP           | 182 (32.0%)         | 22 <sup>a</sup> (13.5%)  | 160 <sup>b</sup> (39.5%) | 0.000    |
| GID           | 151 (26.6%)         | 31 <sup>a</sup> (19%)    | 120 <sup>b</sup> (29.6%) | 0.010    |
| GUD           | 122 (21.5%)         | 49 <sup>a</sup> (30.1%)  | 73 <sup>b</sup> (18.0%)  | 0.002    |
| DM            | 115 (20.2%)         | 36 <sup>a</sup> (22.1%)  | 79 <sup>a</sup> (19.5%)  | 0.489    |
| RESP          | 93 (16.4%)          | 20 <sup>a</sup> (12.3%)  | 73 <sup>a</sup> (18.0%)  | 0.094    |
| HEMATO        | 60 (10.6%)          | 9 <sup>a</sup> (5.5%)    | 51 <sup>b</sup> (12.6%)  | 0.013    |
| ONCO          | 32 (5.6%)           | 6 <sup>a</sup> (3.7%)    | 26 <sup>a</sup> (6.4%)   | 0.200    |
| NEURO         | 22 (3.9%)           | 6 <sup>a</sup> (3.7%)    | 16 <sup>a</sup> (4.0%)   | 0.880    |
| ALCOHOL       | 14 (2.5%)           | 12 <sup>a</sup> (7.4%)   | 2 <sup>b</sup> (0.5%)    | 0.000    |

Abbreviations: as previously indicated. \* Statistical test:  $\chi^2$ -Chi square test. <sup>a,b,c</sup> The same subscript letter denotes a subset of categories whose column proportions do not differ significantly from each other at the 0.05 level. Different subscript letters denote column proportions which differ significantly from each other at the 0.05 level.

NOTE: % is expressed as a function of the total for each of the columns (N=568, N=163 and N=405 respectively).

## Supplementary table 2: Likelihood Ratio Tests

| Effect           | Model Fitting Criteria |                      |                                    | Likelihood Ratio Tests |    |       |
|------------------|------------------------|----------------------|------------------------------------|------------------------|----|-------|
|                  | AIC of Reduced Model   | BIC of Reduced Model | -2 Log Likelihood of Reduced Model | Chi-Square             | df | Sig.  |
| Intercept        | 705.673                | 849.510              | 637.673 <sup>a</sup>               | 0.000                  | 0  | ---   |
| ApoE ε4 carriers | 705.219                | 840.595              | 641.219                            | 3.546                  | 2  | 0.170 |
| ApoE ε3 carriers | 704.767                | 840.142              | 640.767                            | 3.094                  | 2  | 0.213 |
| ApoE ε2 carriers | 707.966                | 843.342              | 643.966                            | 6.293                  | 2  | 0.043 |
| Gender           | 706.147                | 841.523              | 642.147                            | 4.474                  | 2  | 0.107 |
| Age Group        | 716.139                | 843.053              | 656.139                            | 18.465                 | 4  | 0.001 |
| Literacy         | 731.027                | 857.941              | 671.027                            | 33.353                 | 4  | 0.000 |
| ADL              | 716.895                | 852.270              | 652.895                            | 15.222                 | 2  | 0.000 |
| IADL             | 717.093                | 852.469              | 653.093                            | 15.420                 | 2  | 0.000 |
| HYP              | 702.789                | 838.165              | 638.789                            | 1.116                  | 2  | 0.572 |
| OA               | 703.634                | 839.009              | 639.634                            | 1.960                  | 2  | 0.375 |
| DEP              | 704.364                | 839.739              | 640.364                            | 2.691                  | 2  | 0.260 |
| GID              | 716.569                | 851.944              | 652.569                            | 14.895                 | 2  | 0.001 |
| DM               | 703.730                | 839.105              | 639.730                            | 2.056                  | 2  | 0.358 |
| NEURO            | 712.906                | 848.281              | 648.906                            | 11.233                 | 2  | 0.004 |

The chi-square test statistic is the difference in -2 log-likelihoods between the final model and a reduced model. The reduced model is formed by omitting an effect from the final model. The null hypothesis is that all parameters of that effect are 0. <sup>a</sup>This reduced model is equivalent to the final model given that omitting the effect does not increase the degrees of freedom. The ApoE allele carriers, Age group, Literacy, Katz Index, IADL, Neurodegenerative disorders and Gastrointestinal Disease contribute significantly to the cognitive performance of individuals (based on the CDR test).
